# Supplementary material for: An innovative approach for separation and purification of natural products using carbon nanotube–alginate gel beads as a novel stationary phase
Source: Royal Society of Chemistry journal article supplement (doi:10.1039/c4ra12732c), 2014-12-23

Fig.6 A. HPLC chromatogram of alkaloids of *Dature metel L.*  
B. HPLC chromatogram of atropin after separation by MWCNT-1  
C. HPLC chromatogram of anisodamine after separation by MWCNT-1

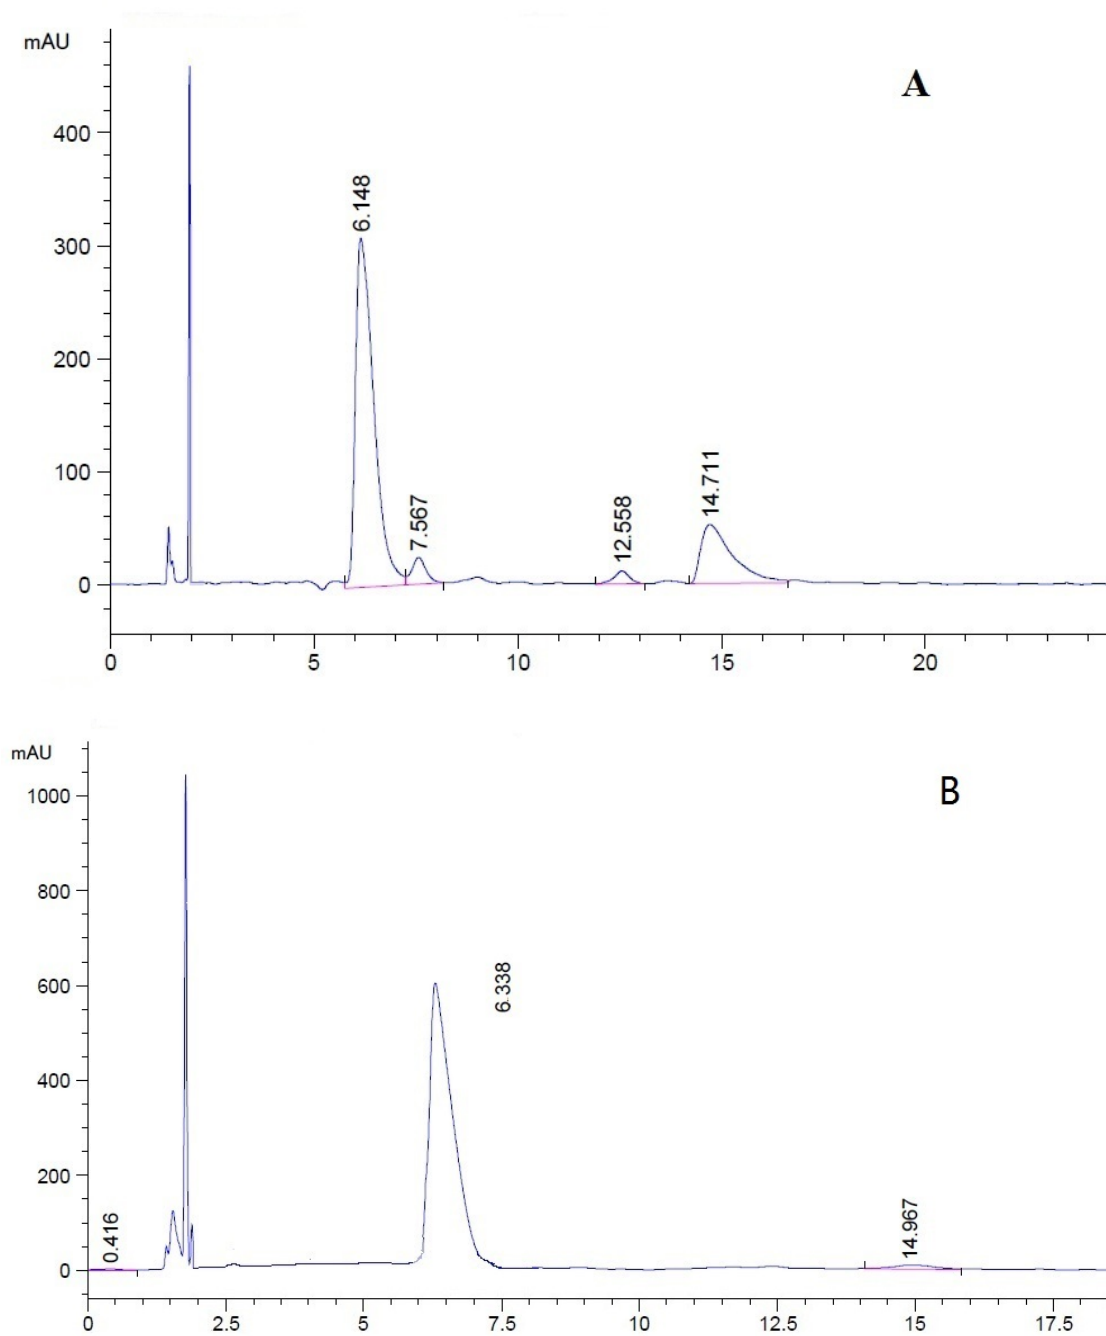

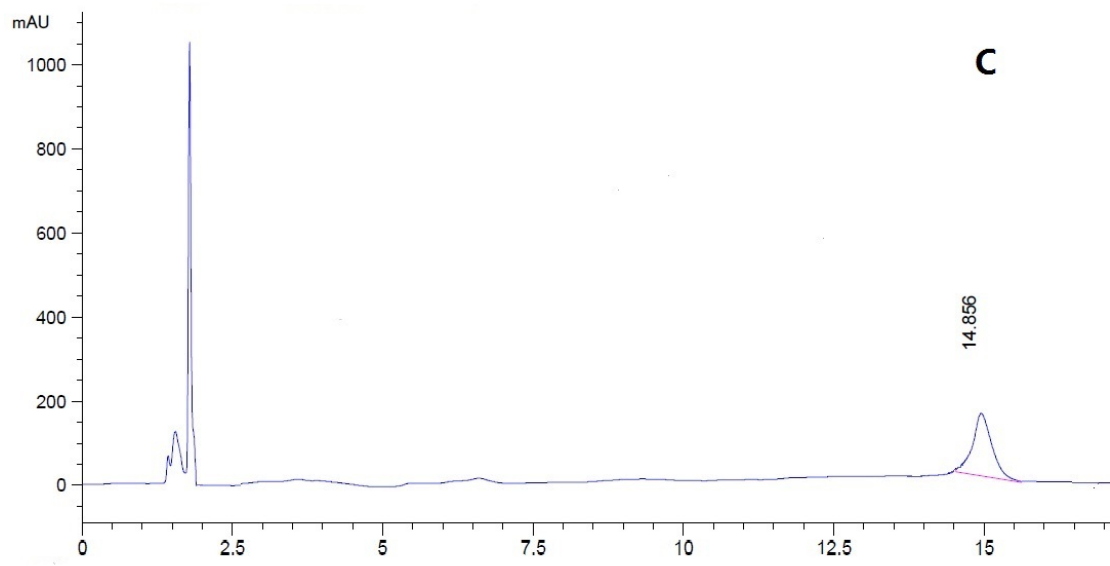

Supplement: c4ra12732c1.pdf [file c4ra12732c1.pdf]
